# Supplementary material
Source: publisher figshare collection journal article supplement (https://frontiersin.figshare.com/ndownloader/files/28364631)
Supplement: Supplementary file [file 28364631]

## Supplementary file

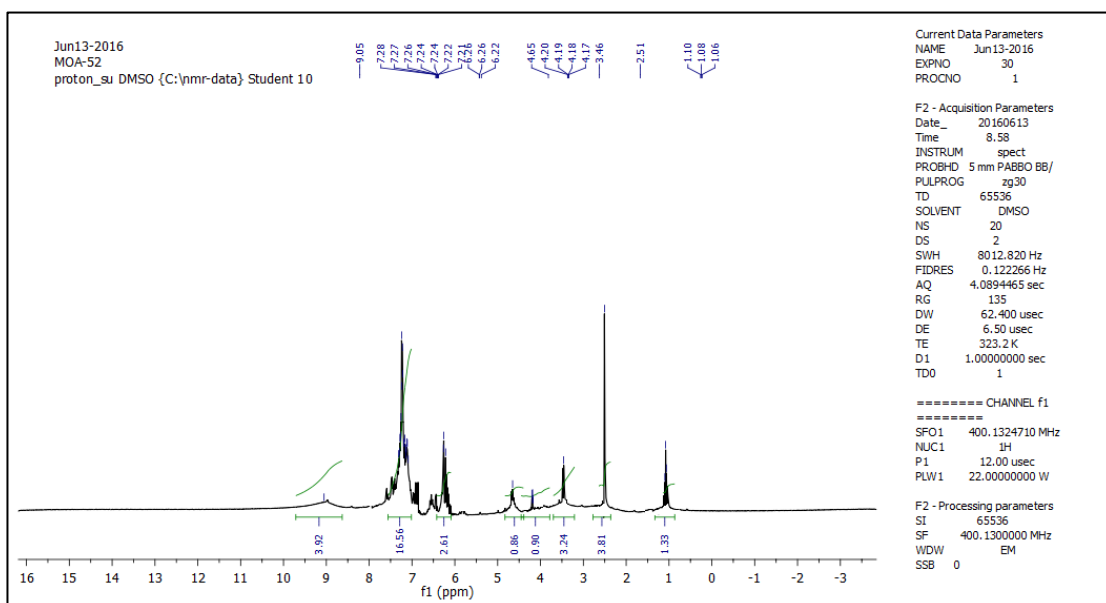

Figure S1.  $^1\text{H}$ -NMR spectrum of compound 5a

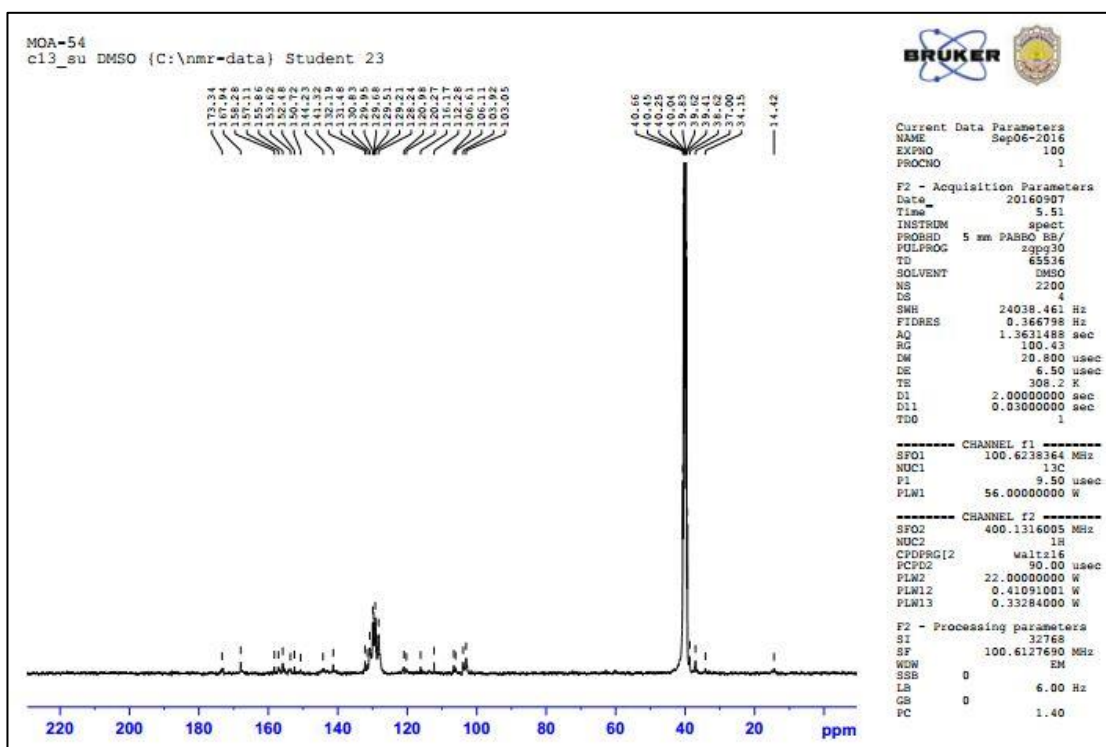

Figure S2.  $^{13}\text{C}$ -NMR spectrum of compound 5a

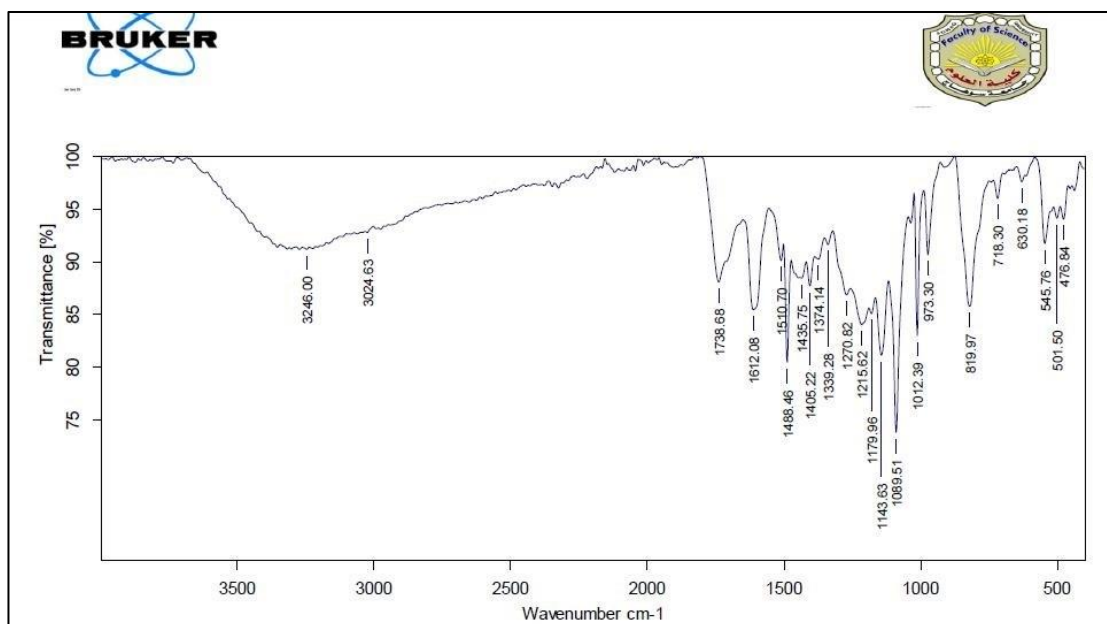

Figure S3. IR spectrum of compound 5b

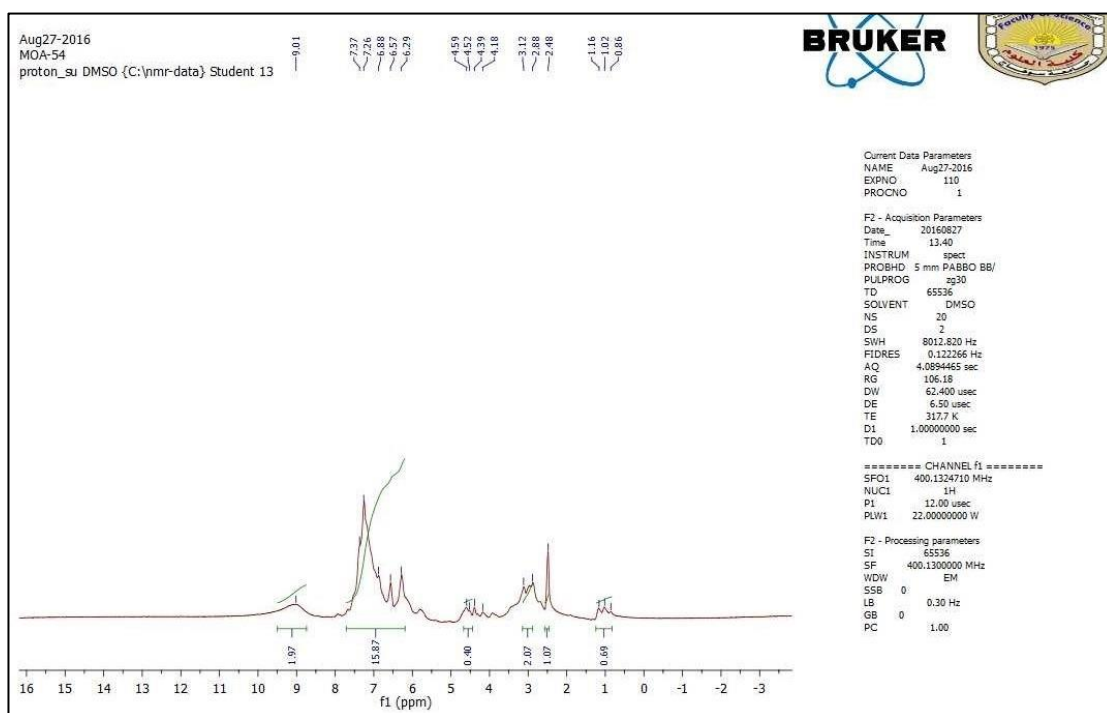

Figure S4. <sup>1</sup>H-NMR spectrum of compound 5b

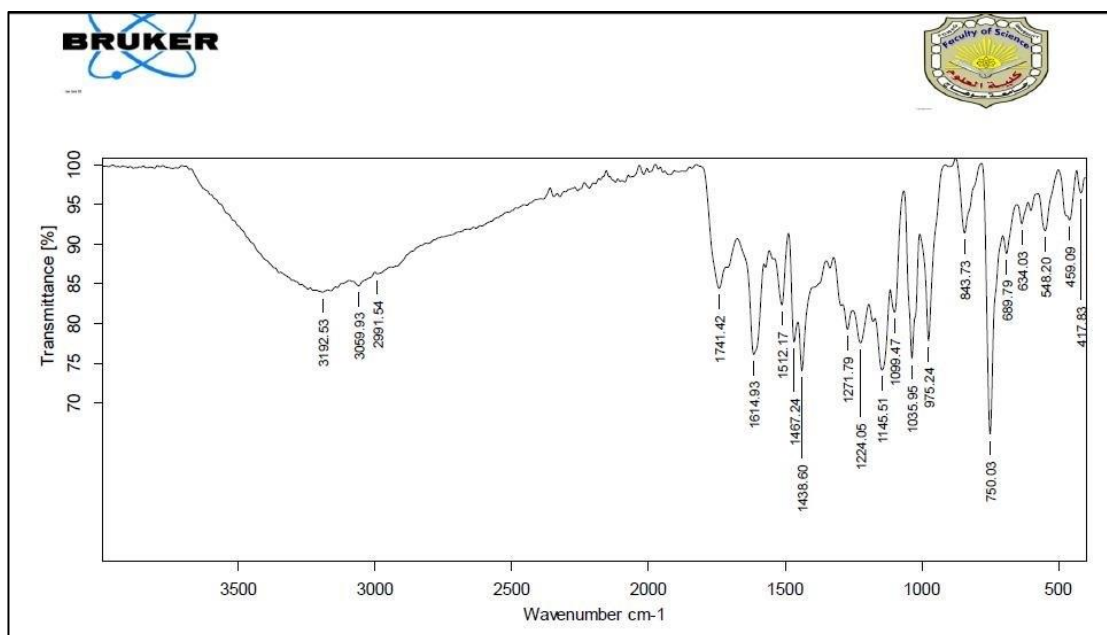

Figure S5. IR spectrum of compound 5c

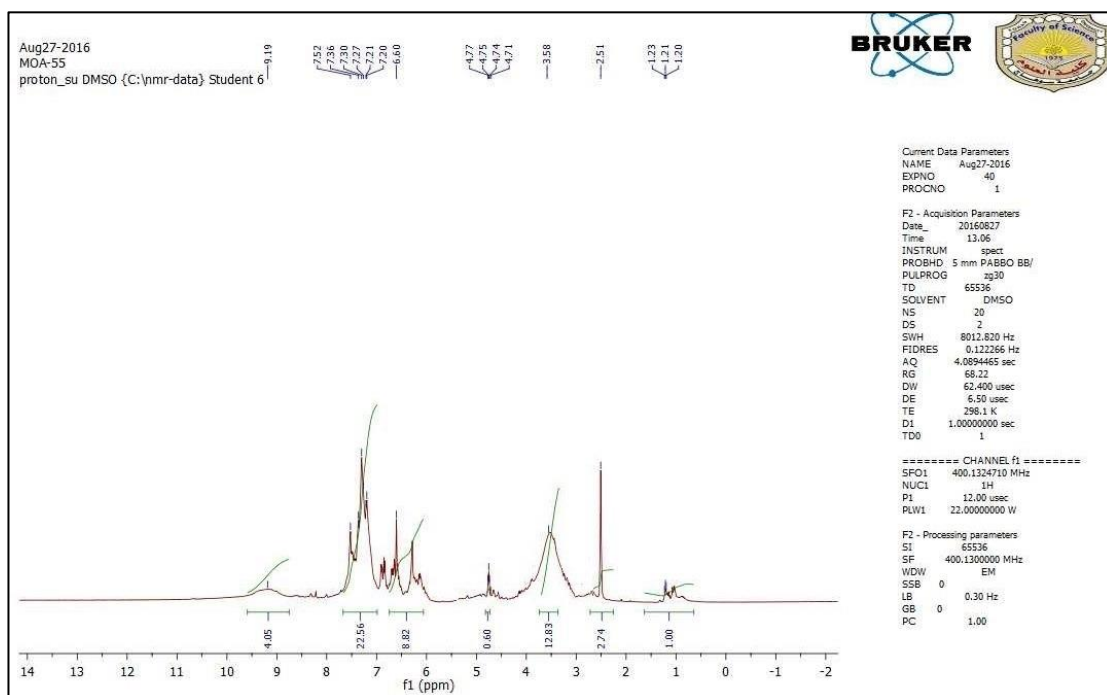

Figure S6. <sup>1</sup>H-NMR spectrum of compound 5c

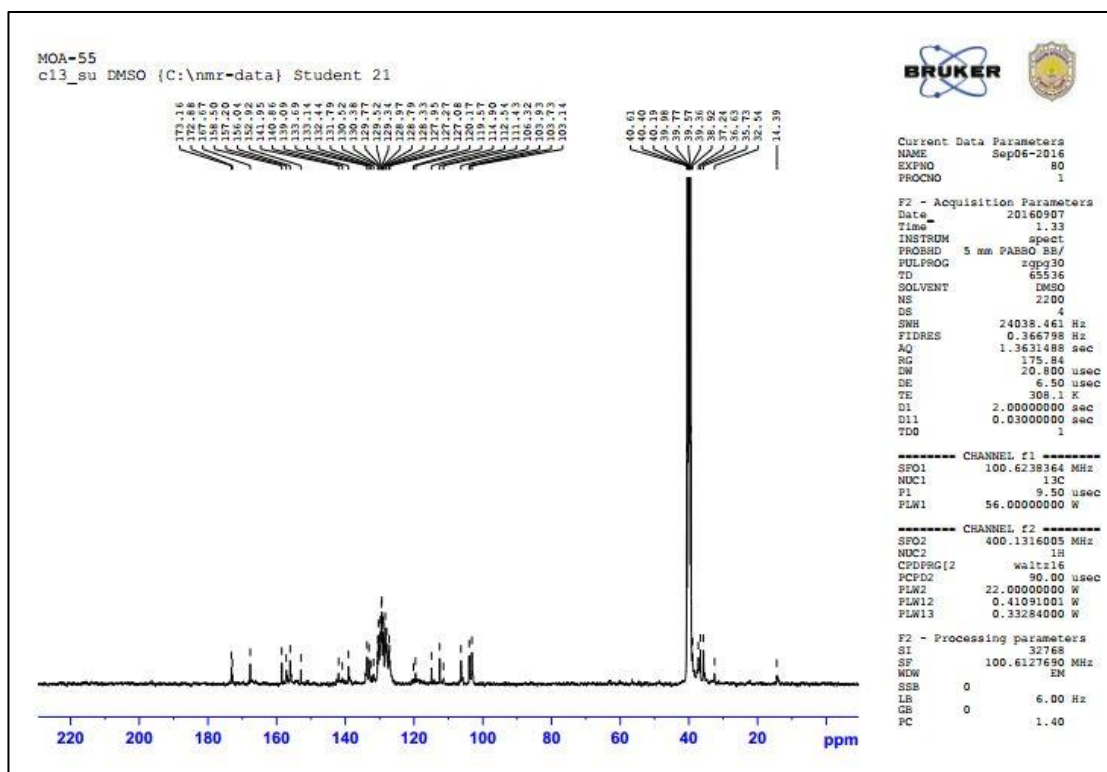

Figure S7.  $^{13}\text{C}$ -NMR spectrum of compound 5c

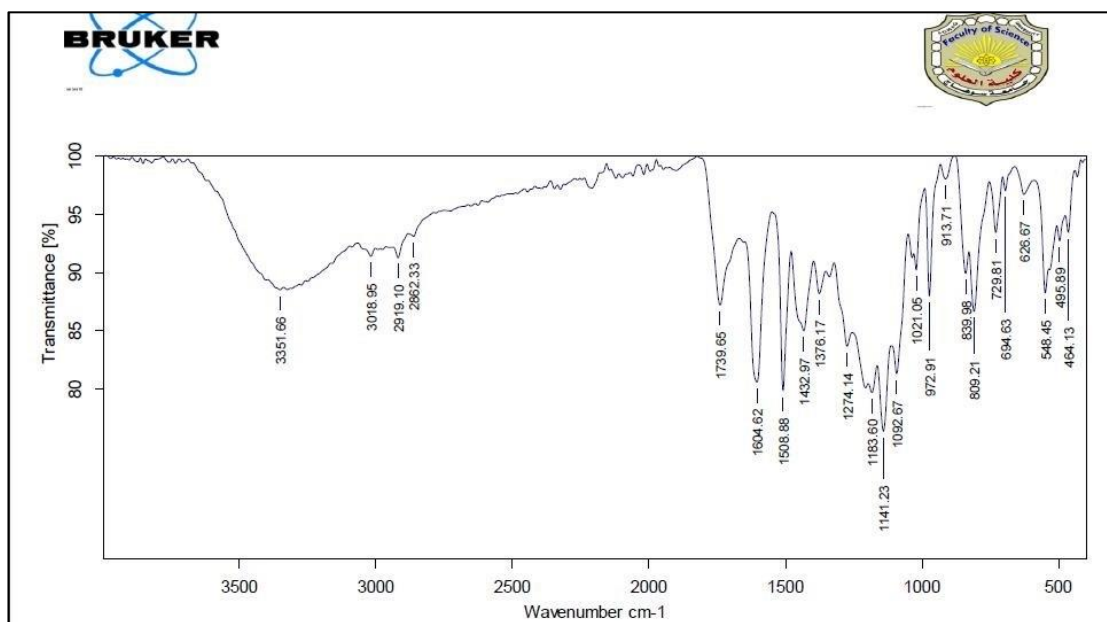

Figure S8. IR spectrum of compound 5d

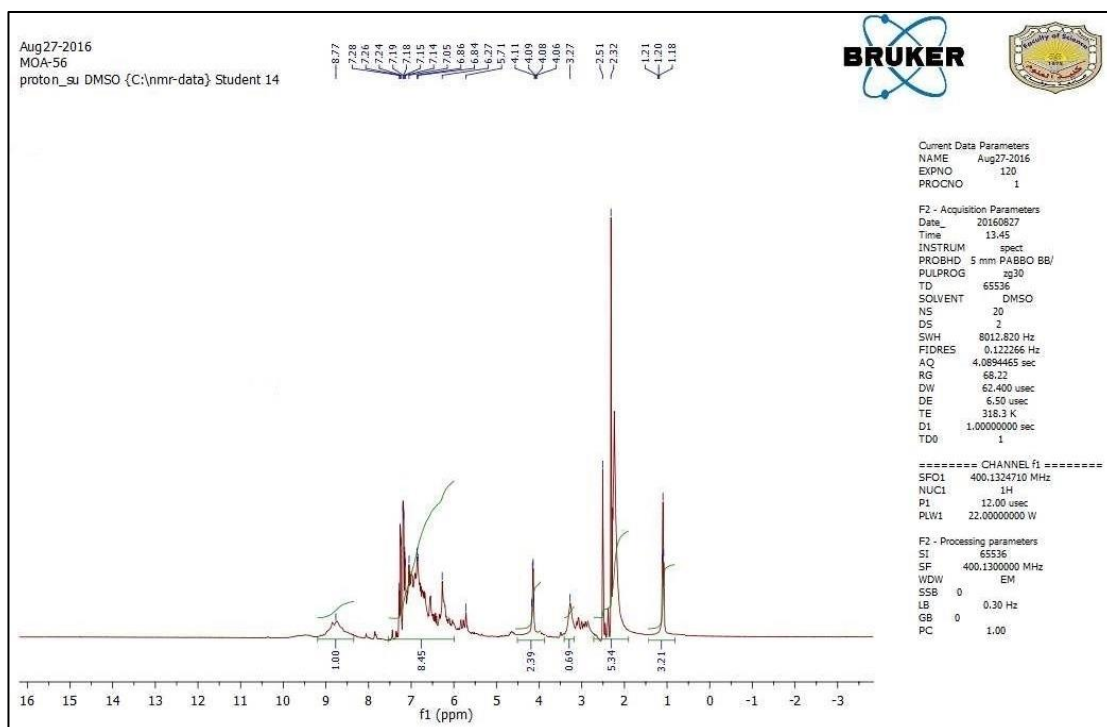

Figure S9.  $^1\text{H}$ -NMR spectrum of compound 5d

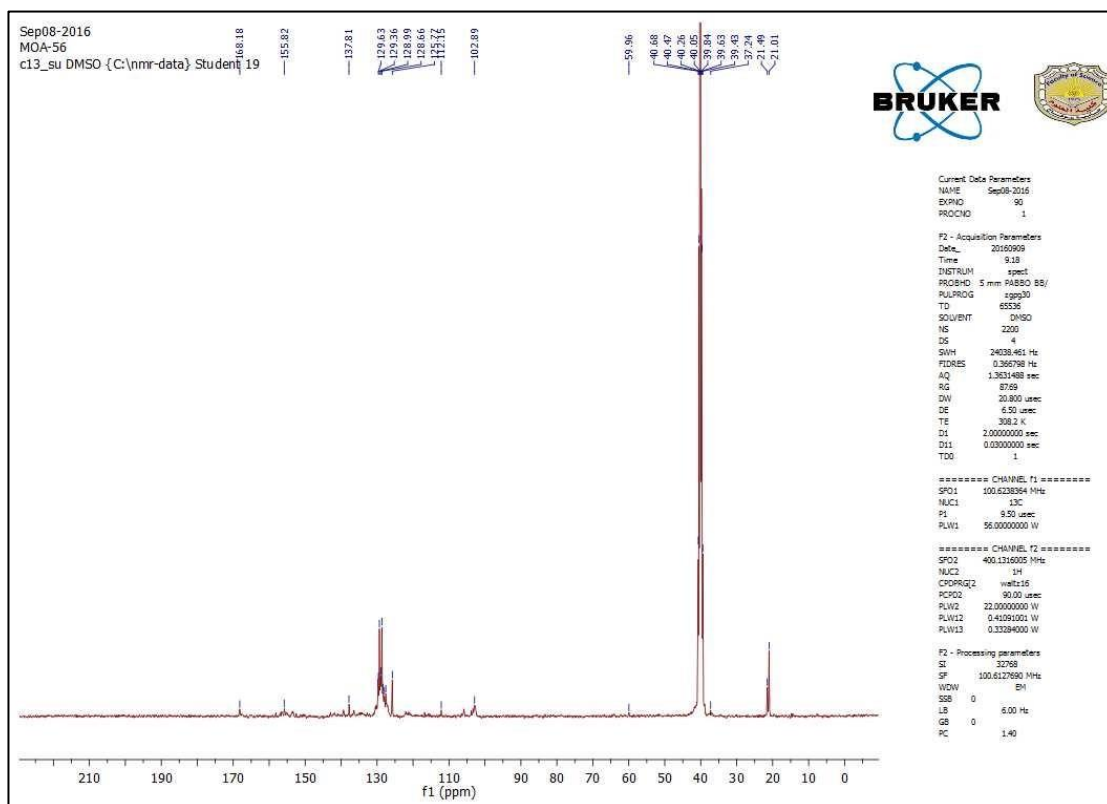

Figure S10.  $^{13}\text{C}$ -NMR spectrum of compound 5d



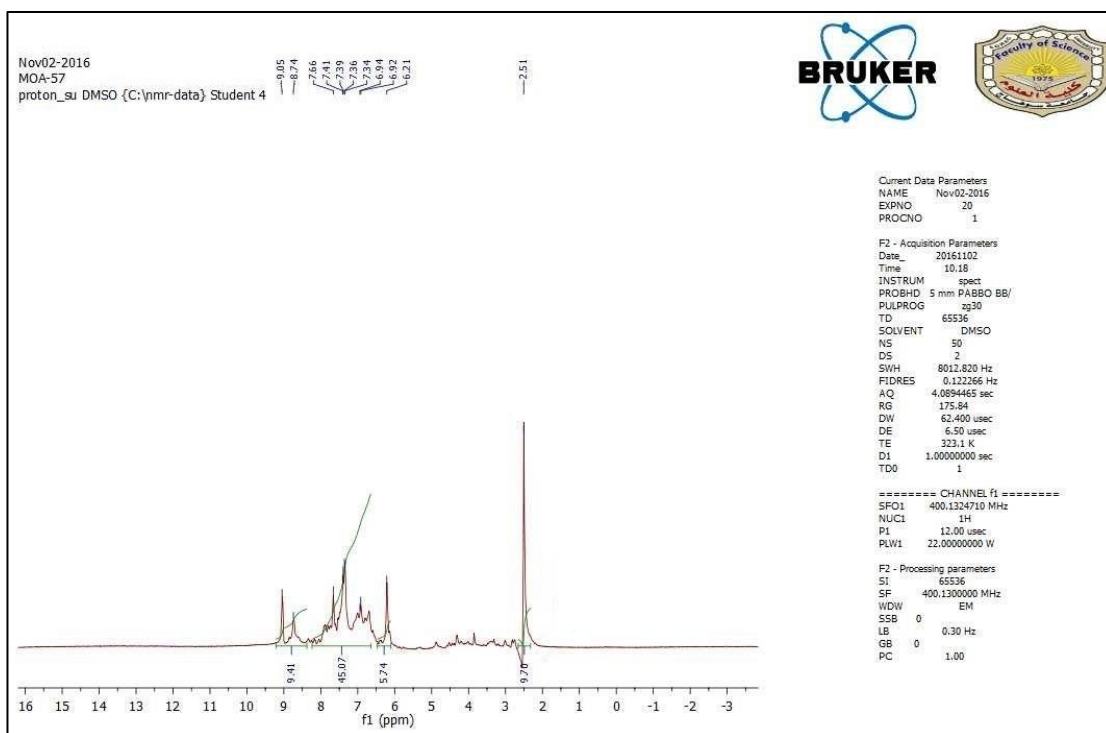

Figure S13.  $^1\text{H}$ -NMR spectrum of compound 6

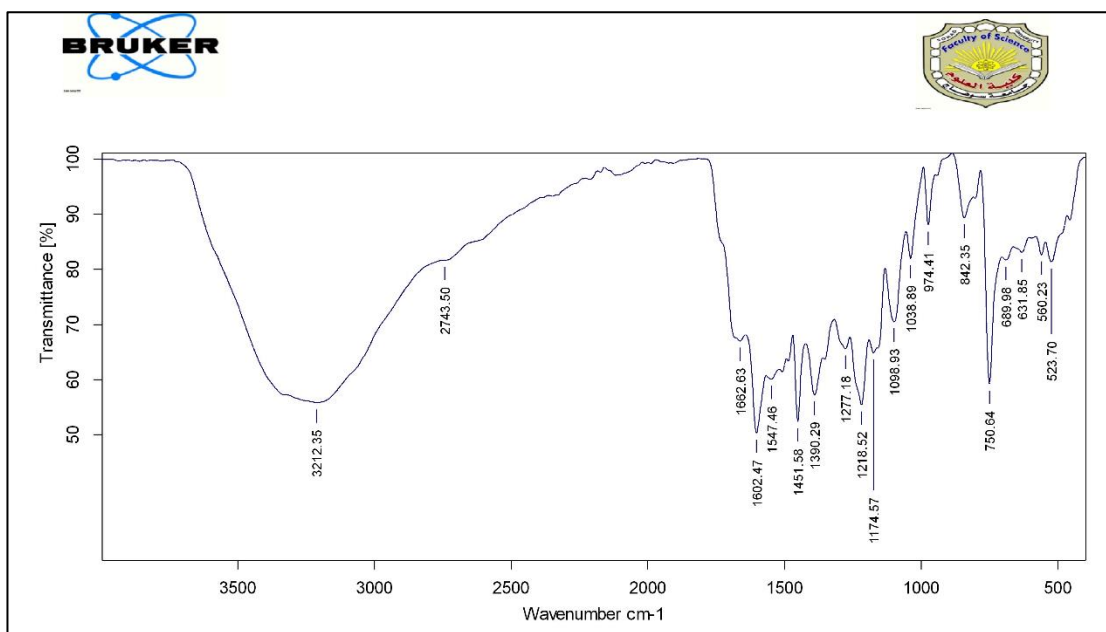

Figure S14. IR spectrum of compound 7



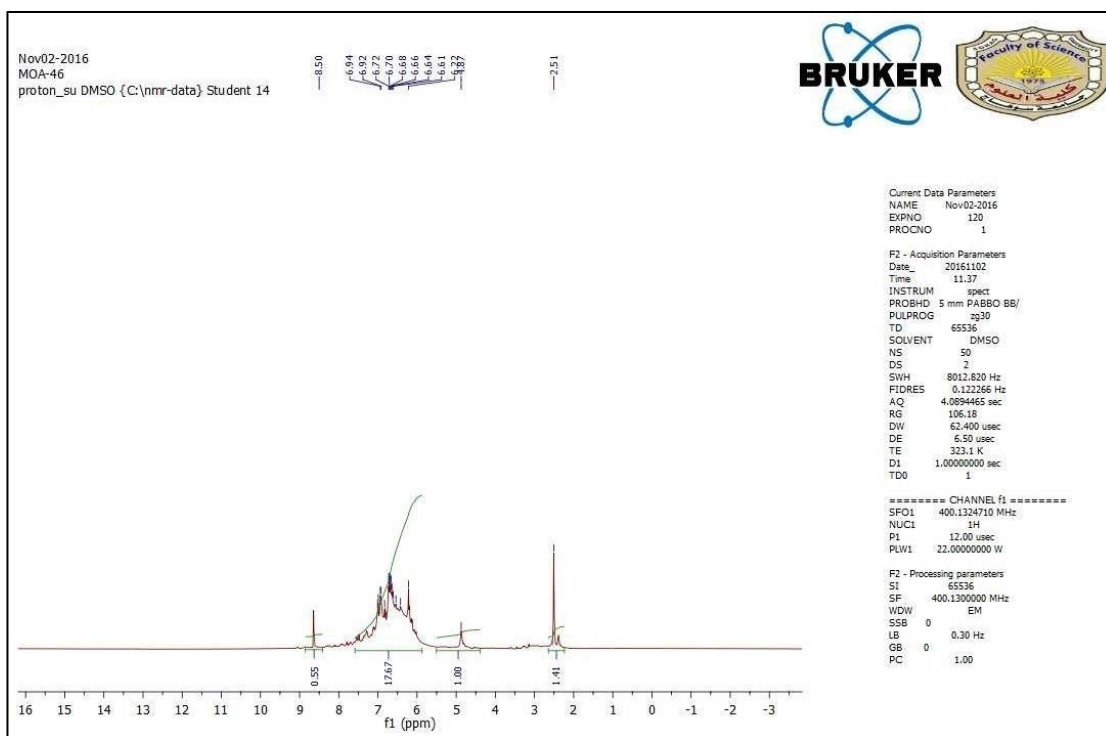

**Figure S15.  $^1\text{H}$ -NMR spectrum of compound 7**

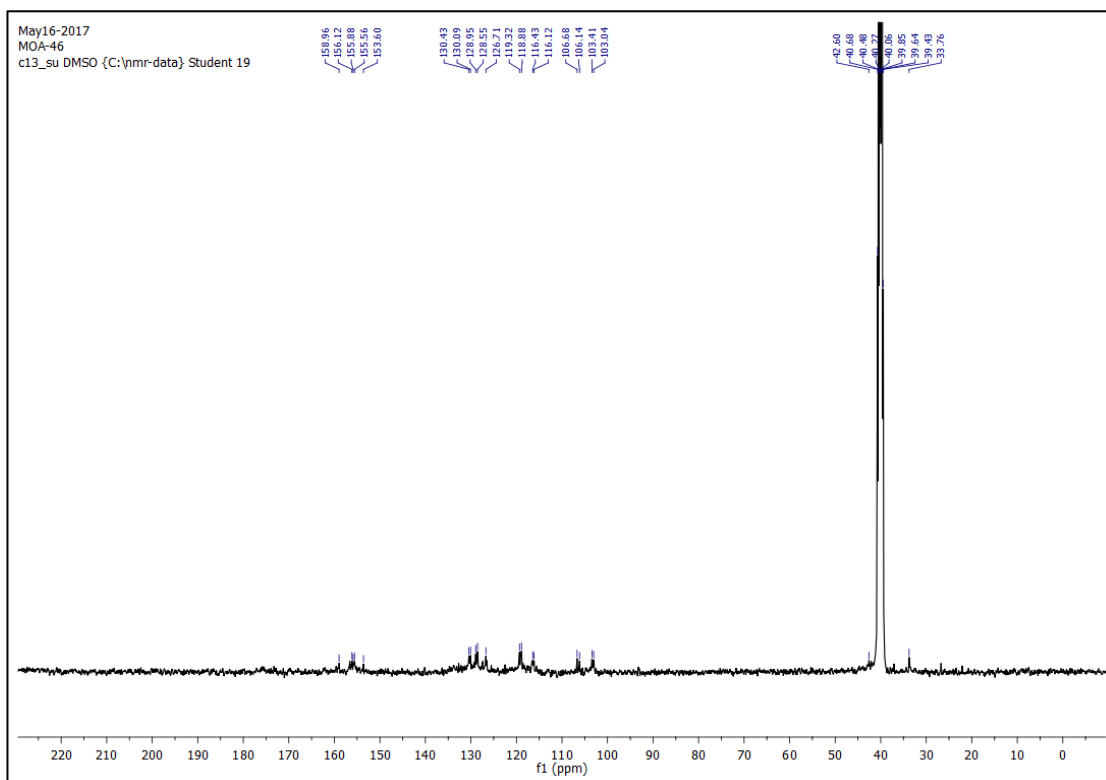

**Figure S16.  $^{13}\text{C}$ -NMR spectrum of compound 7**



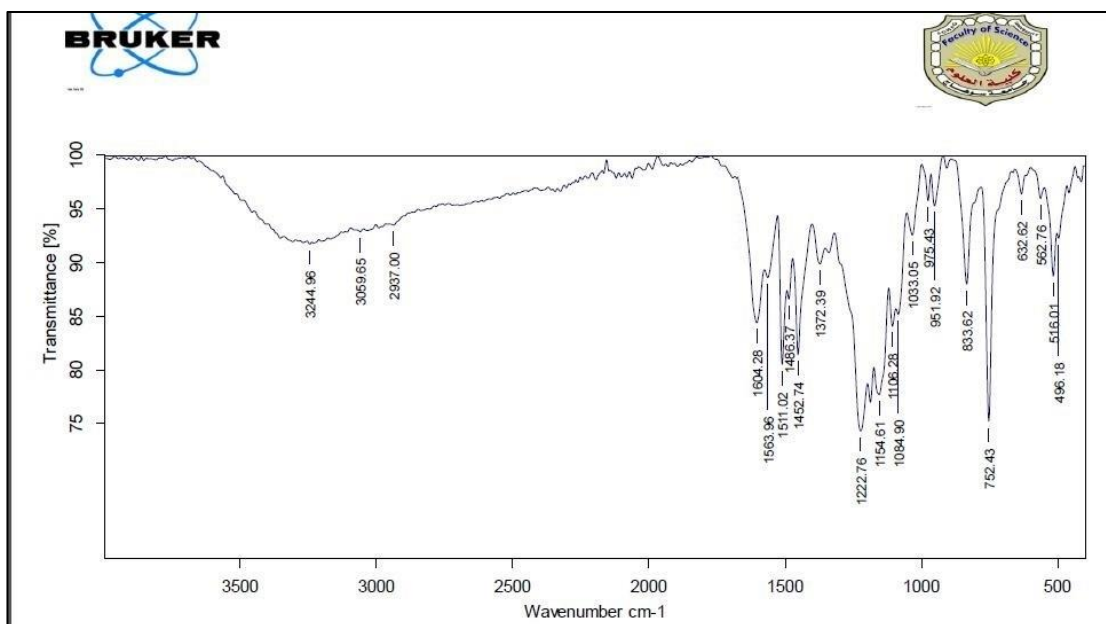

Figure S17. IR spectrum of compound 9

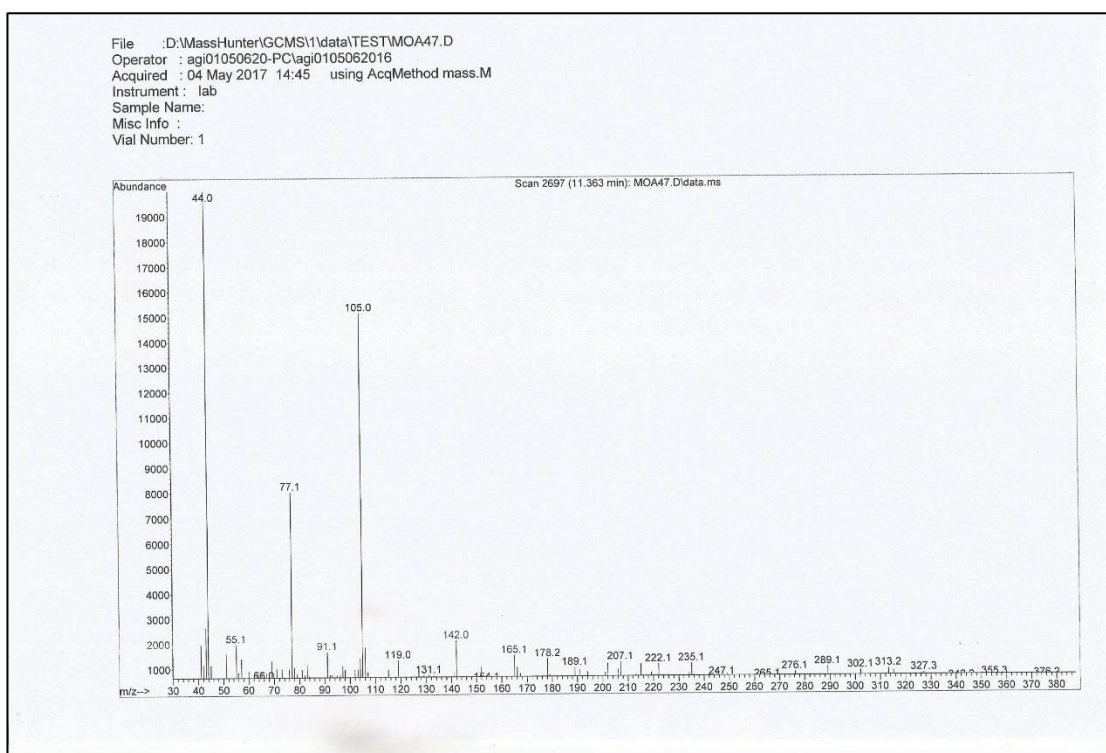

Figure S18. Mass spectrum of compound 9

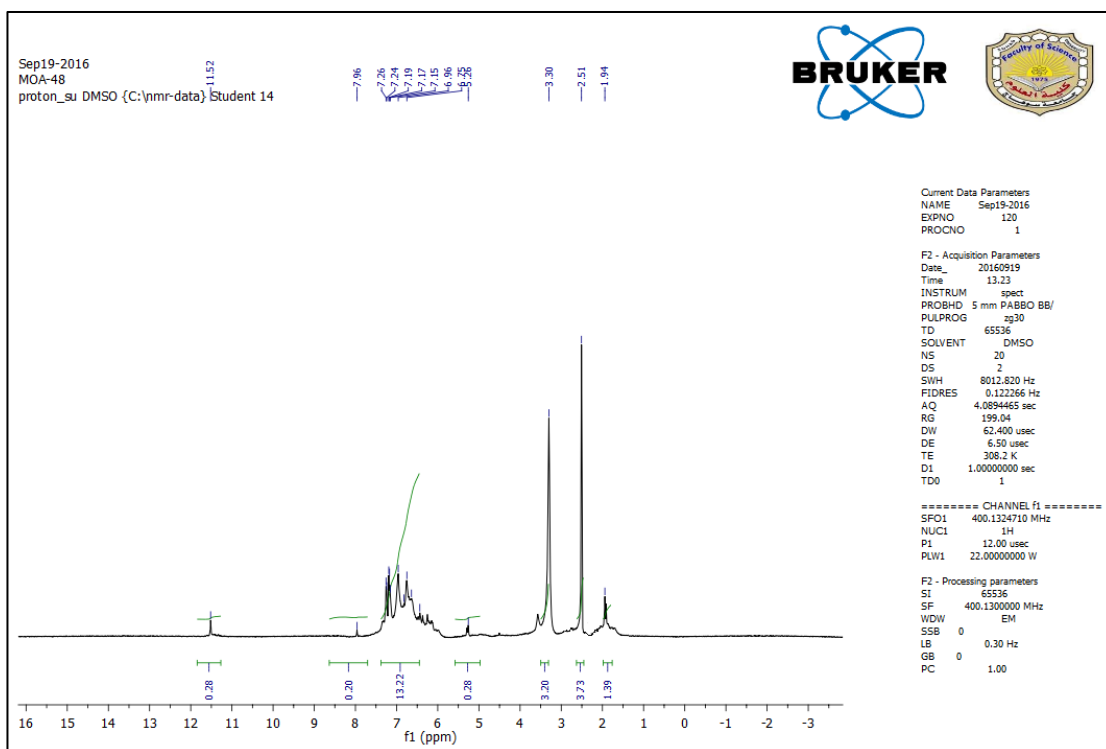

**Figure S19.  $^1\text{H}$ -NMR spectrum of compound 9**

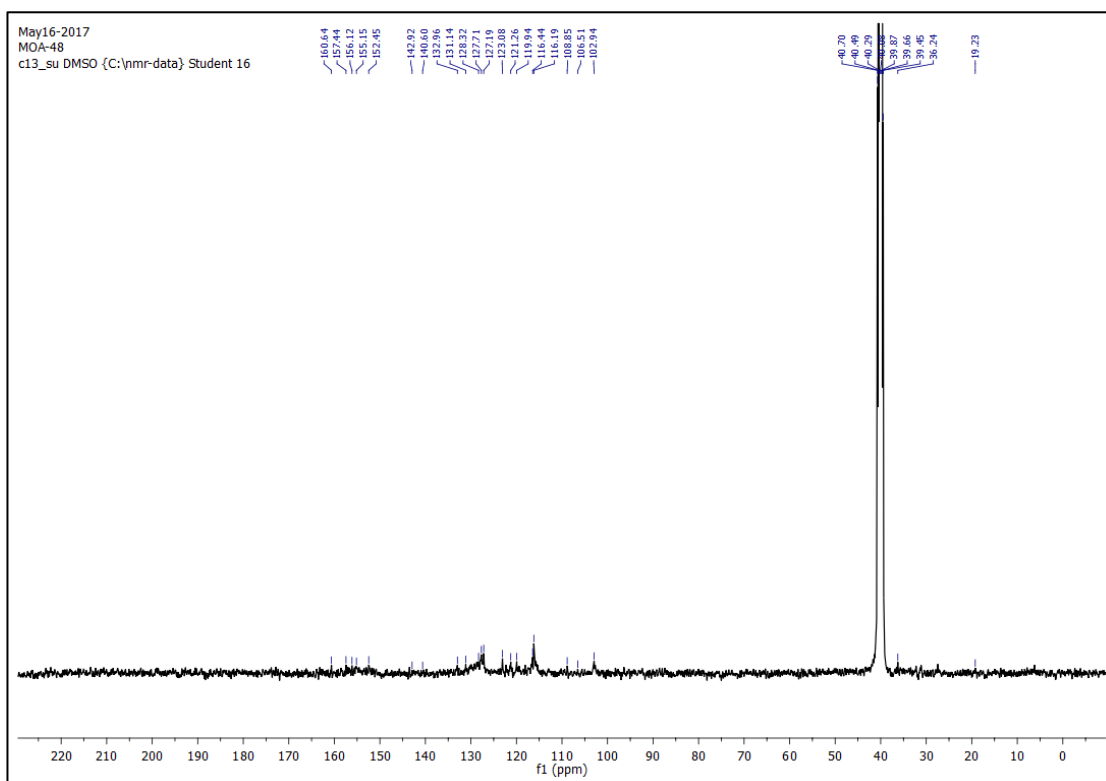

**Figure S20.  $^{13}\text{C}$ -NMR spectrum of compound 9**

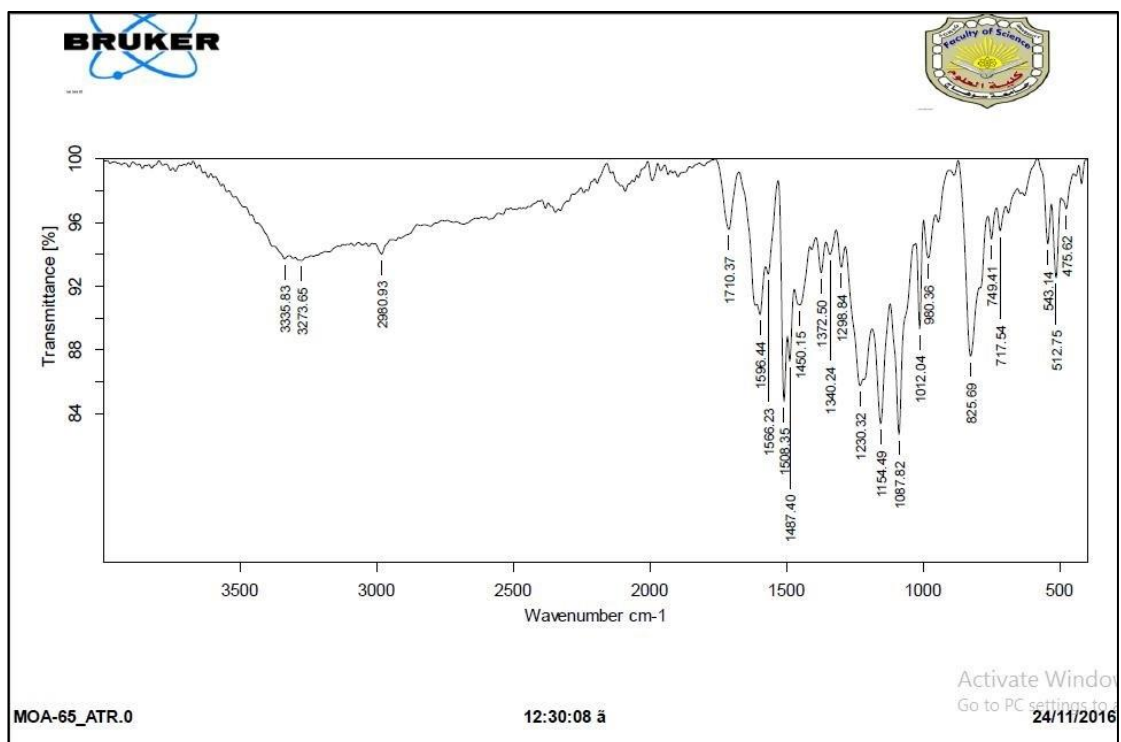

Figure S21. IR spectrum of compound 10

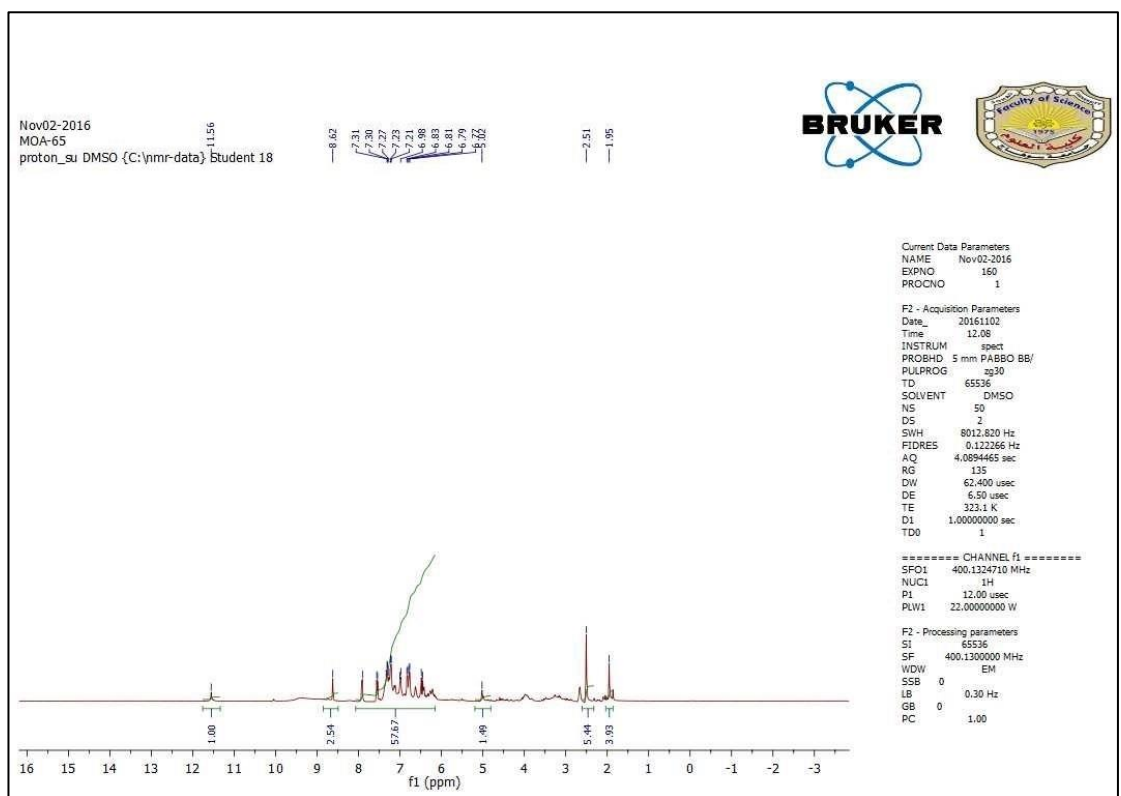

Figure S22. <sup>1</sup>H-NMR spectrum of compound 10

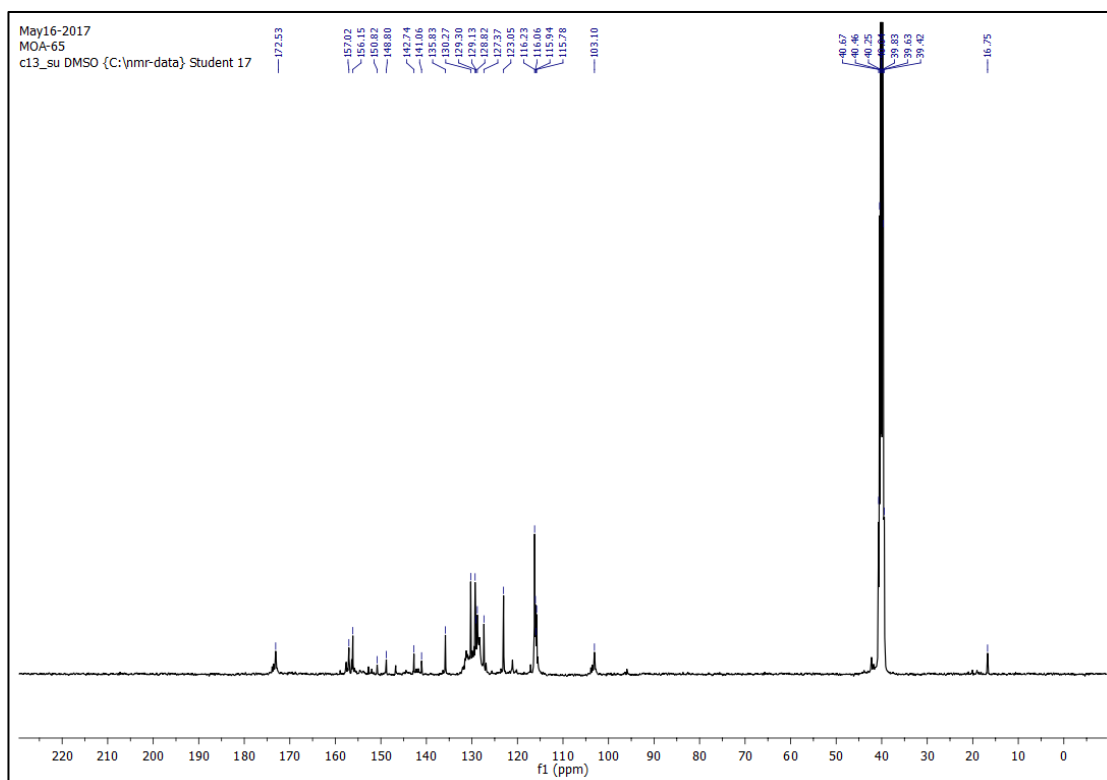

Figure S23.  $^{13}\text{C}$ -NMR spectrum of compound 10

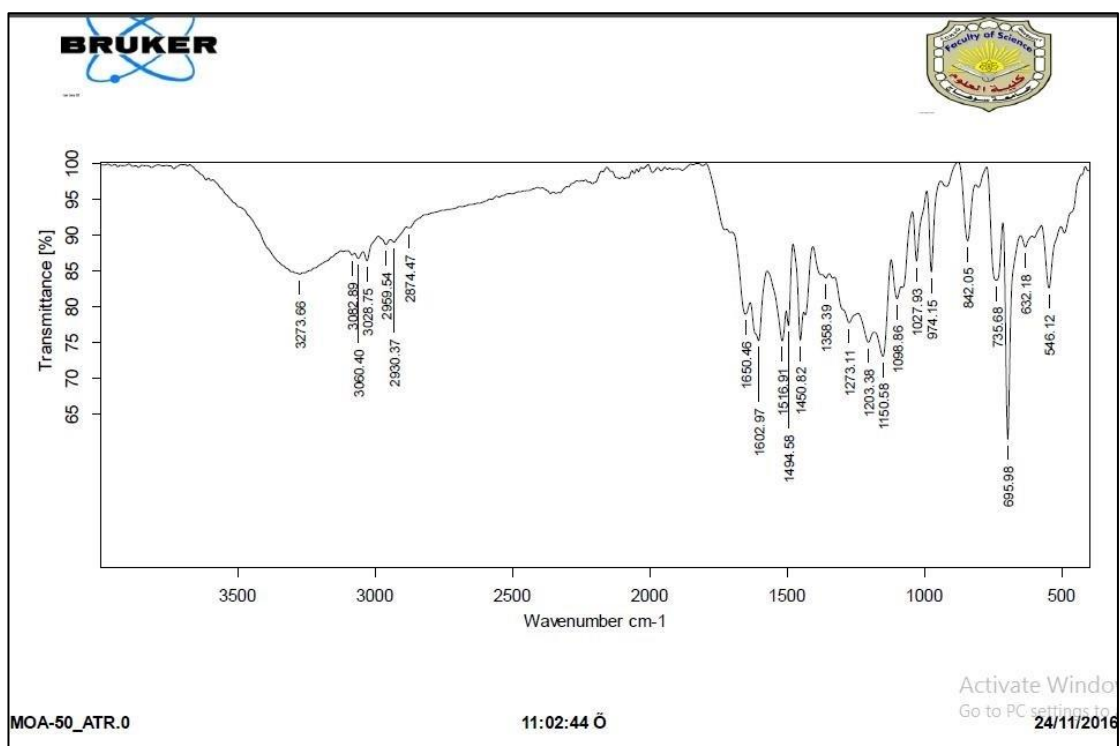

Figure S24. IR spectrum of compound 11

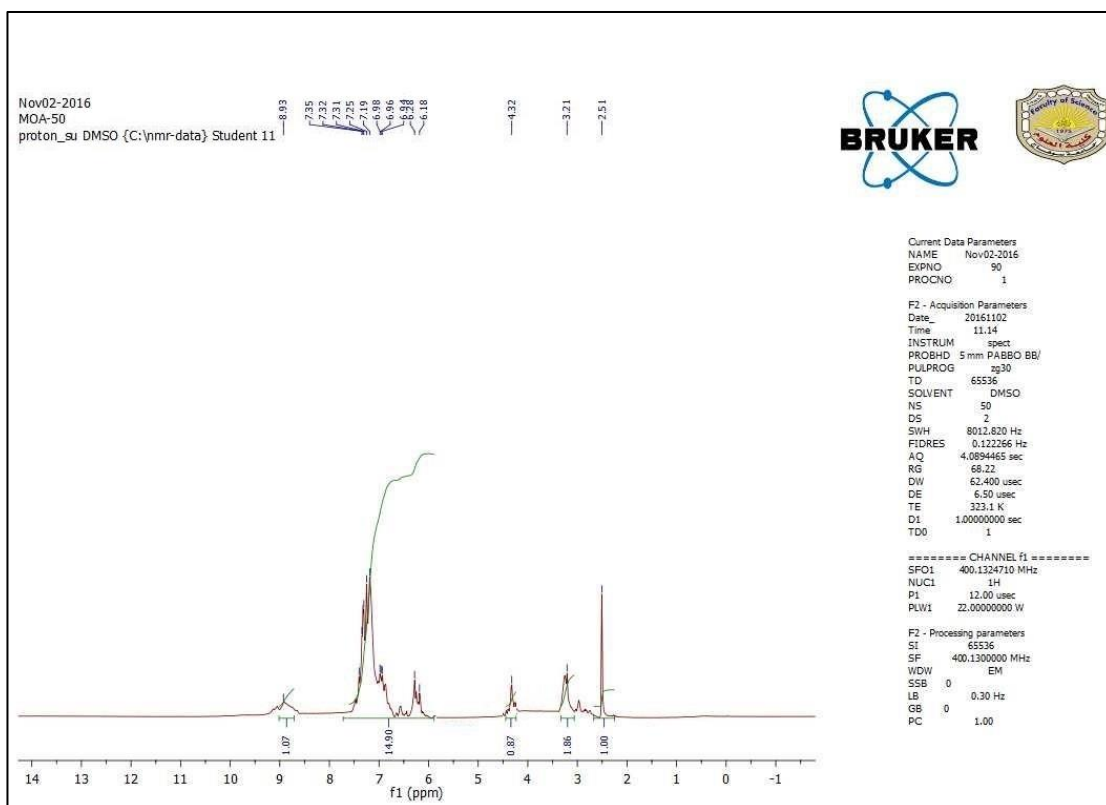

Figure S25.  $^1\text{H}$ -NMR spectrum of compound 11

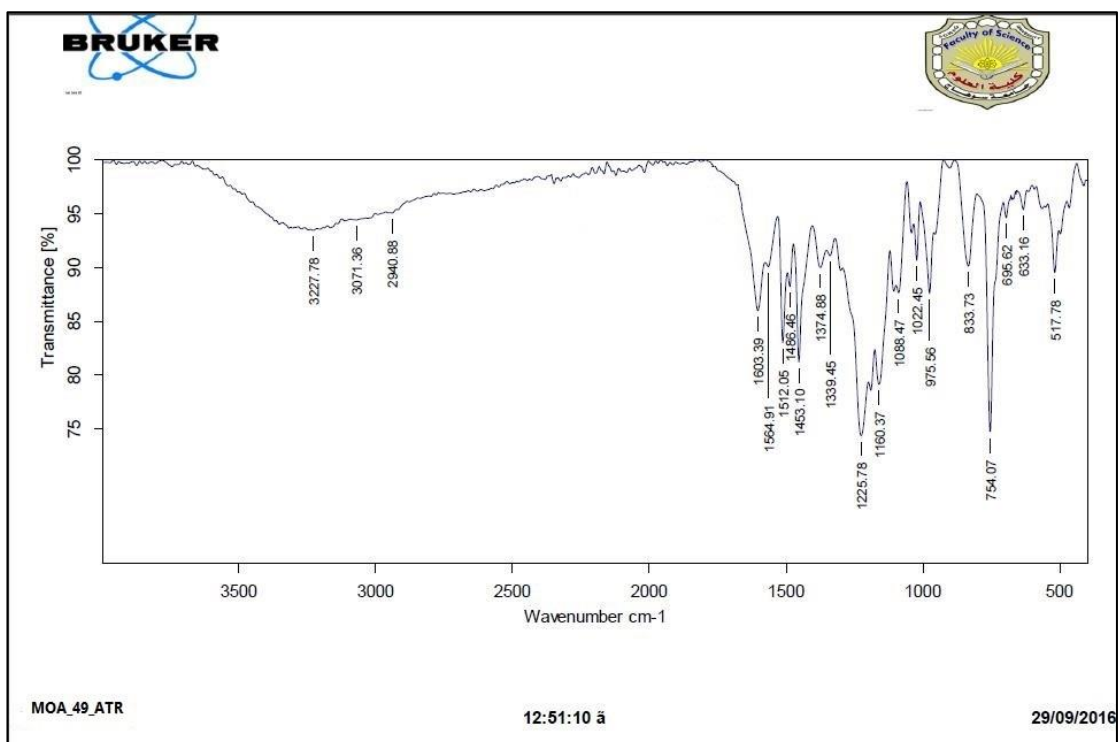

Figure S26. IR spectrum of compound 12

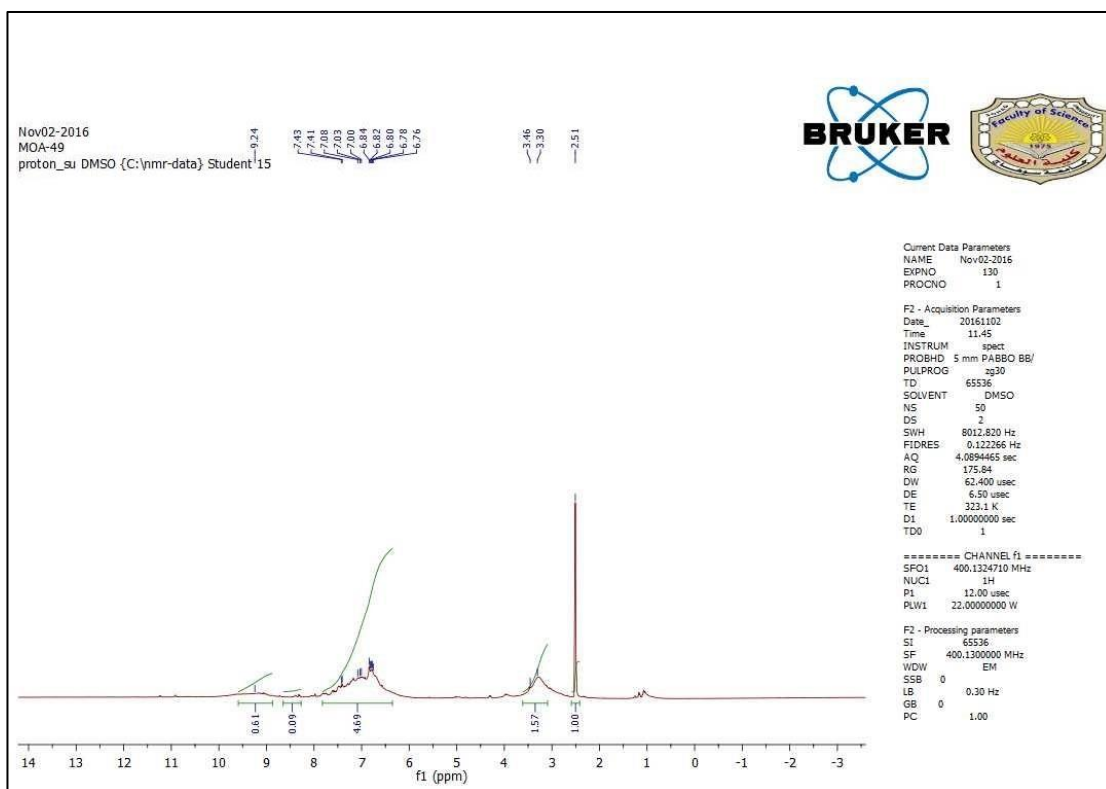

**Figure S27.  $^1\text{H}$ -NMR spectrum of compound 12**

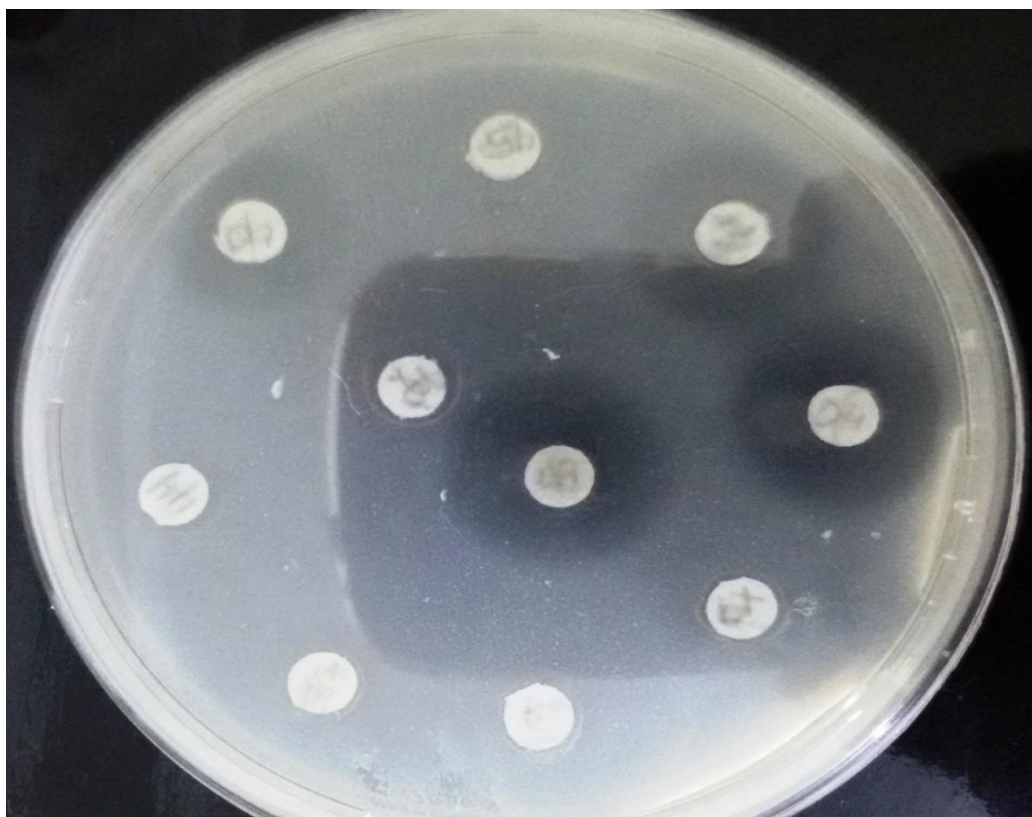

**Figure S28. Antibacterial activity of the tested compounds.**



**Compound 5a**

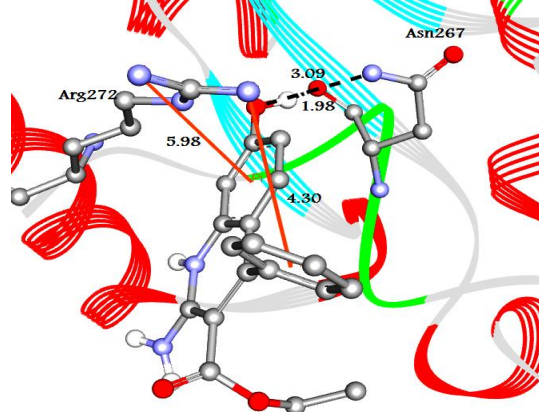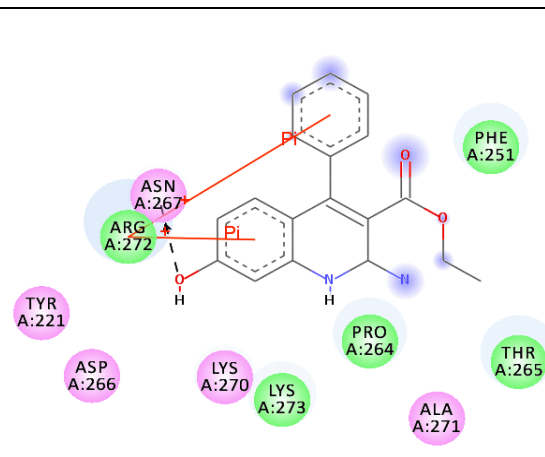

**Compound 5b**

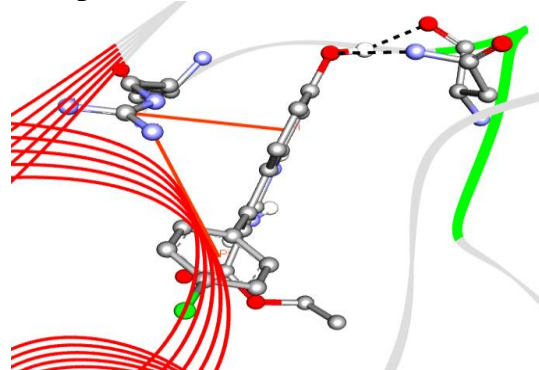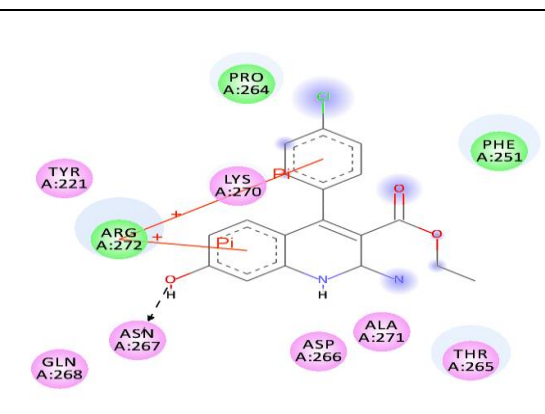

**Compound 5c**

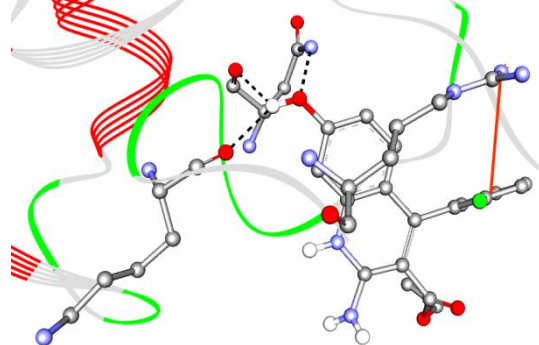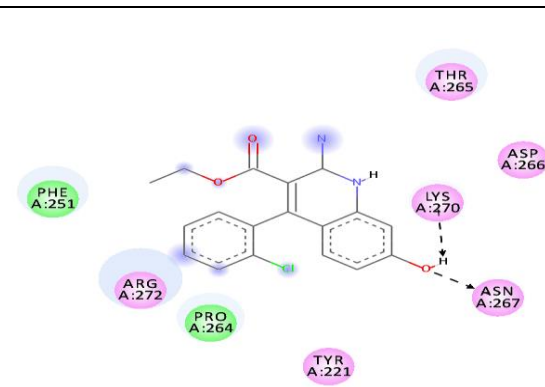

**Compound 5d**

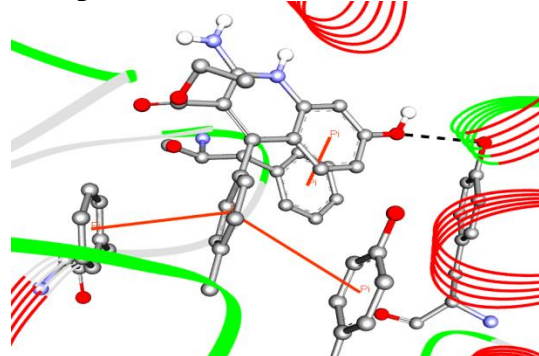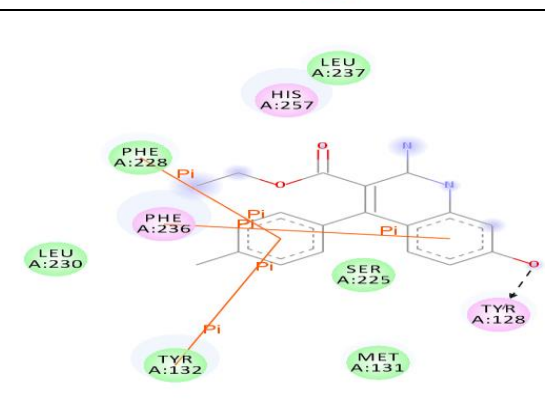



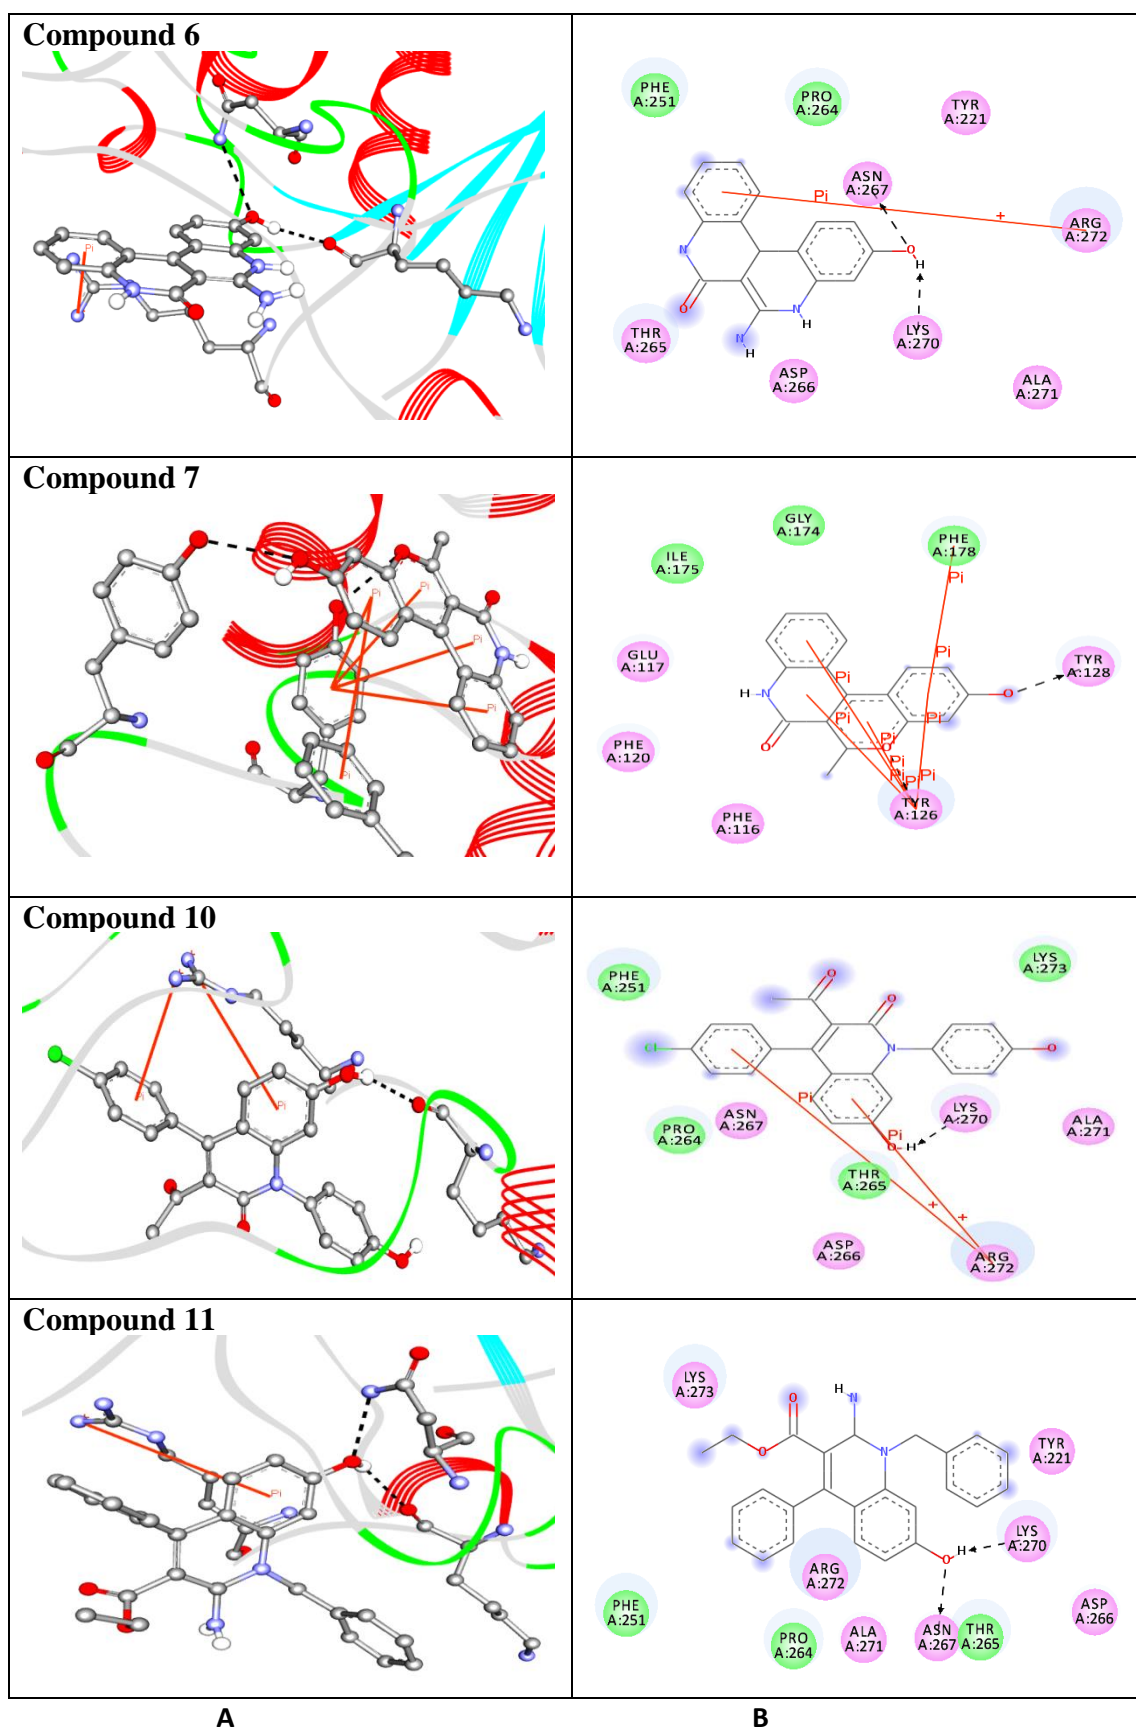

**Figure S29.** (A) 3D, (B) 2D representations of the other docked compound with 1DXO. H-bonds are represented in black dotted lines while pi-interactions are shown in orange lines.

**Compound 5a**

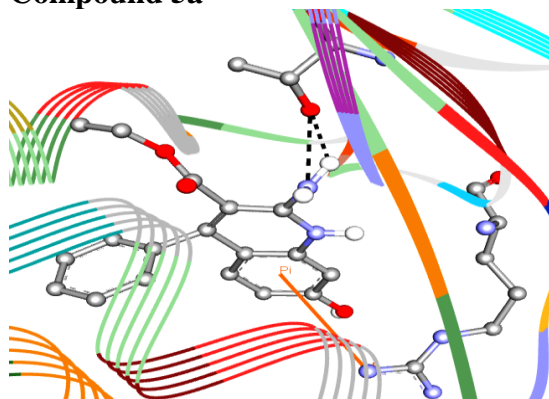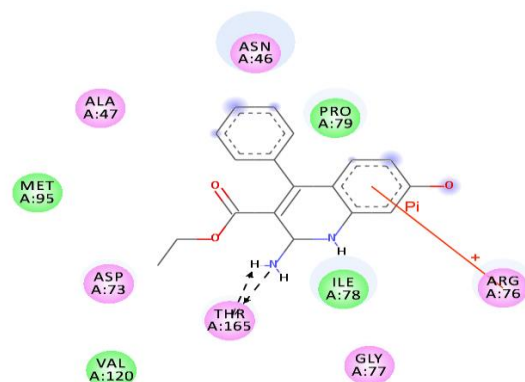

**Compound 5b**

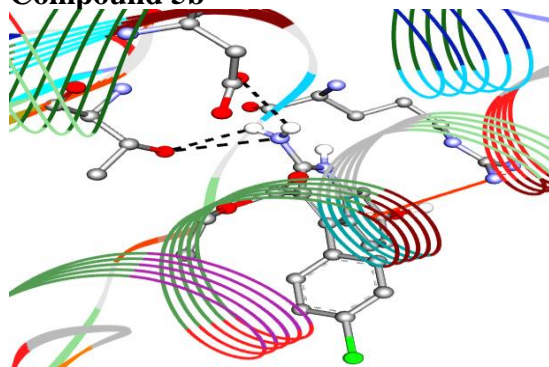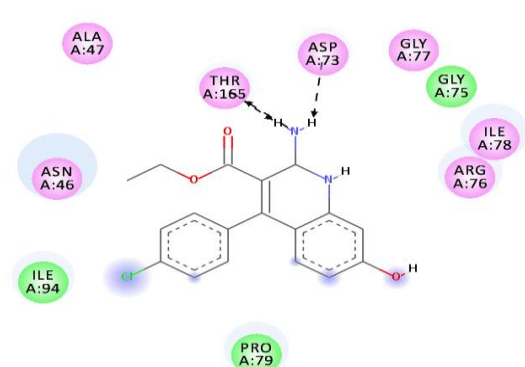

**Compound 5c**

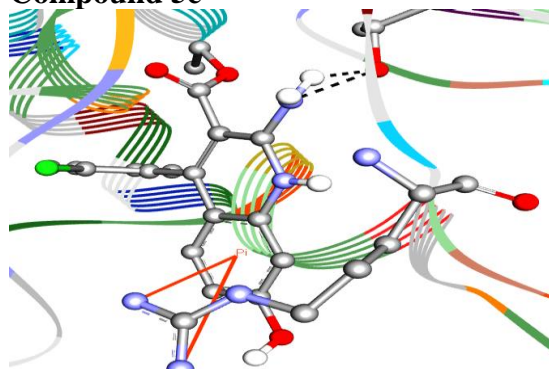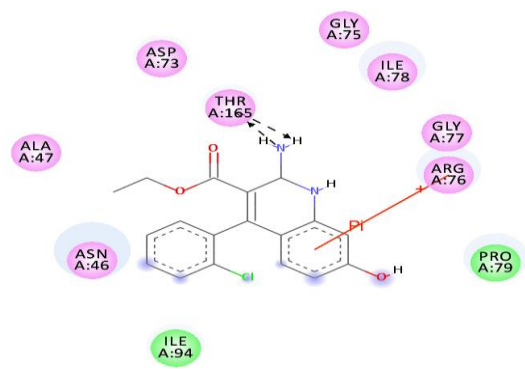

**Compound 5d**

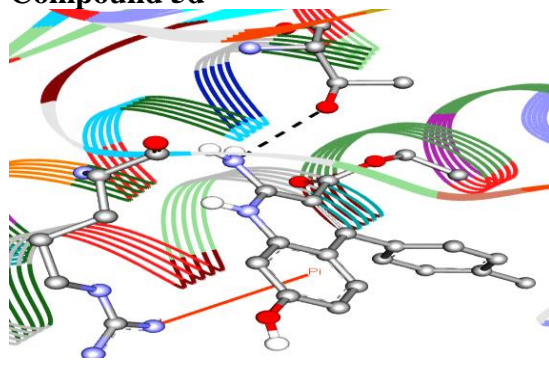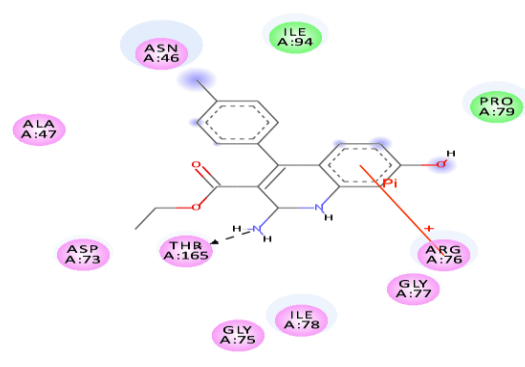

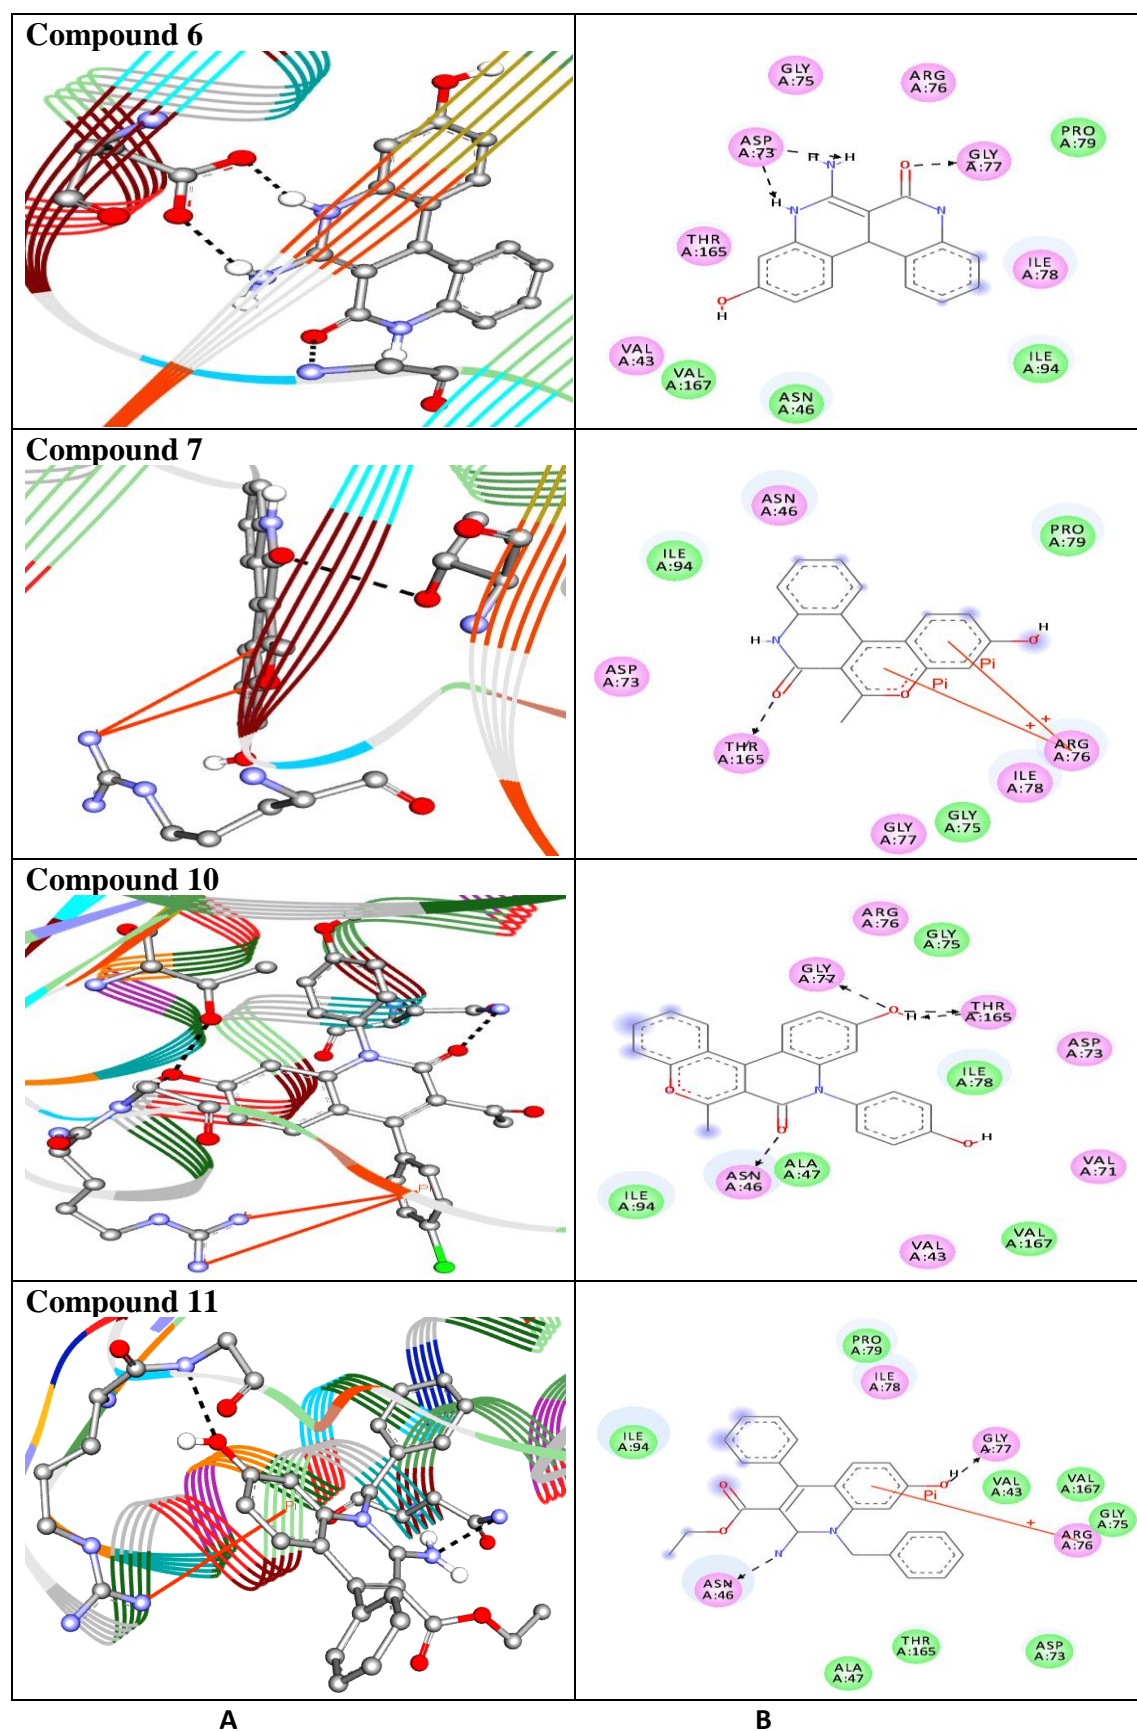

**Figure S30.** (A) 3D, (B) 2D representations of the other docked compound with 1JA6. H-bonds are represented in black dotted lines while pi-interactions are shown in orange lines.
